# Supplementary material
Source: publisher figshare collection journal article supplement (https://acs.figshare.com/ndownloader/files/7687783)
Supplement: Supplementary file 1 [file 7687783]

# Supporting Information

## Ultra-Sensitive Room-Temperature Operable Gas Sensors using p-Type Na:ZnO Nanoflowers for Diabetes Detection

*Rawat Jaisutti<sup>1,2,†</sup>, Minkyung Lee<sup>3,†</sup>, Jaeyoung Kim<sup>3</sup>, Seungbeom Choi<sup>3</sup>, Tae-Jun Ha<sup>4</sup>,  
Jaekyun Kim<sup>5</sup>, Hyounsub Kim<sup>2</sup>, Sung Kyu Park<sup>6,\*</sup>, and Yong-Hoon Kim<sup>2,3,\*</sup>*

<sup>1</sup>Department of Physics, Faculty of Science and Technology, Thammasat University, Pathum Thani, Thailand

<sup>2</sup>School of Advanced Materials Science and Engineering, Sungkyunkwan University, Suwon, Korea

<sup>3</sup>SKKU Advanced Institute of Nanotechnology (SAINT), Sungkyunkwan University, Suwon, Korea

<sup>4</sup>Department of Electronic Materials Engineering, Kwangwoon University, Seoul, Korea

<sup>5</sup>Department of Photonics and Nanoelectronics, Hanyang University, Ansan, Korea

<sup>6</sup>School of Electrical and Electronic Engineering, Chung-Ang University, Seoul, Korea

**\*Corresponding authors:**

E-mail: yhkim76@skku.edu

E-mail: skpark@cau.ac.kr

Table S1. Hall-effect measurement data of Na:ZnO NFs performed under a magnetic field of 1.5 T at room temperature.

| Sample number | Resistivity ( $\times 10^4 \Omega\text{-cm}$ ) | Hole concentration ( $\text{cm}^{-3}$ )       | Mobility ( $\text{cm}^2 \text{V}^{-1}\text{s}^{-1}$ ) |
|---------------|------------------------------------------------|-----------------------------------------------|-------------------------------------------------------|
| #1            | 1.52–2.71                                      | $2.49 \times 10^{16}$ – $6.72 \times 10^{17}$ | 0.09–1.87                                             |
| #2            | 0.97–1.89                                      | $5.32 \times 10^{16}$ – $7.51 \times 10^{17}$ | 0.23–2.35                                             |
| #3            | 1.28–2.14                                      | $3.48 \times 10^{16}$ – $5.95 \times 10^{17}$ | 0.15–2.08                                             |

Table S2. Compositional analysis data for Na:ZnO NFs characterized by XPS.

| Elements | C 1s  | Na 1s | Zn 2p | O 1s  |
|----------|-------|-------|-------|-------|
| at. %    | 12.94 | 0.67  | 40.96 | 45.43 |

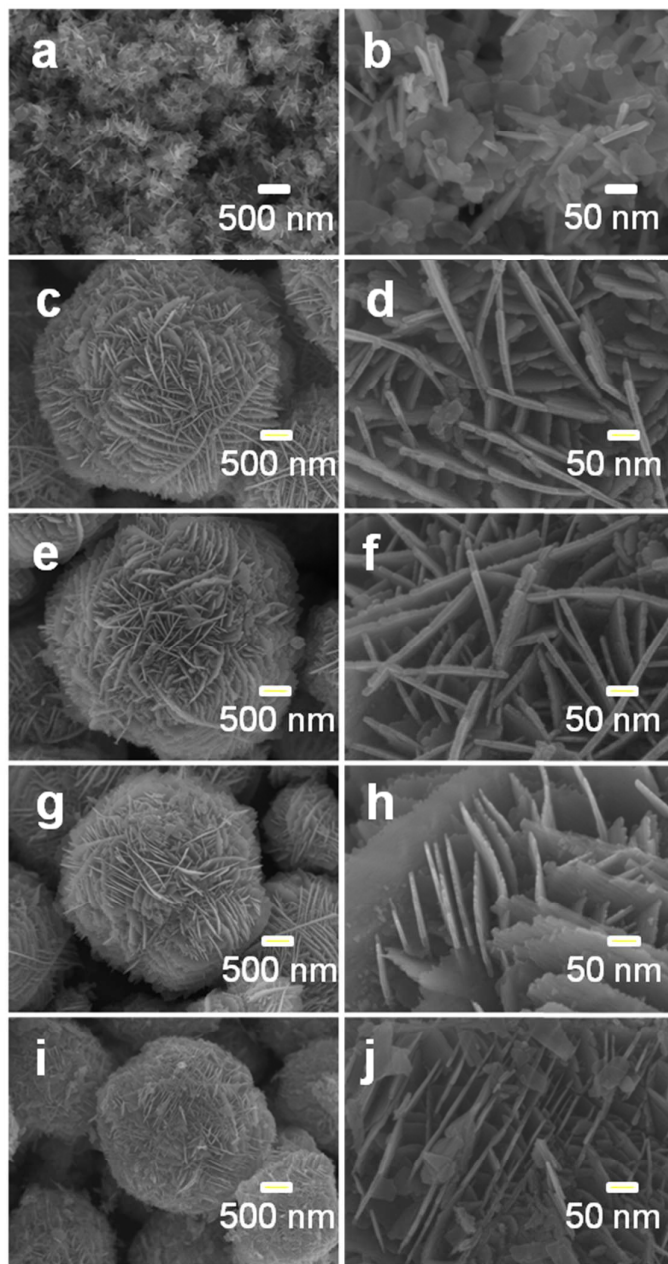

**Figure S1.** FESEM images of the Na:ZnO NFs synthesized with different  $M_{\text{NaCl}}/M_{\text{ZnAc}}$  ratios:

(a–b) 0, (c–d) 0.3, (e–f) 1.2, (g–h) 2.4, and (i–j) 4.8.

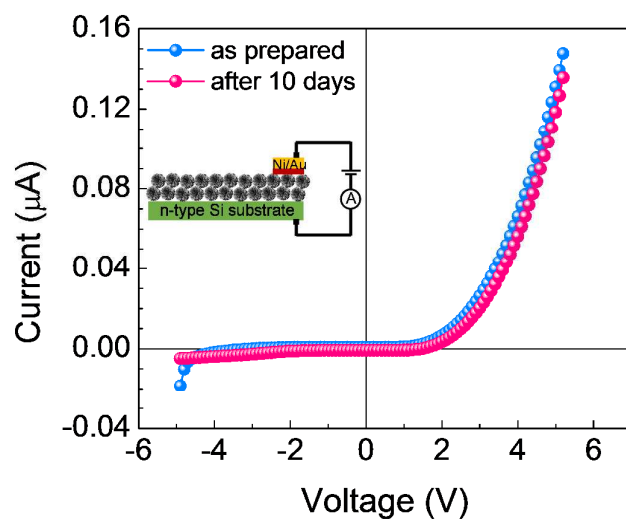

**Figure S2.** *I-V* characteristics of p-type Na:ZnO NF/n-type Si heterojunction devices.

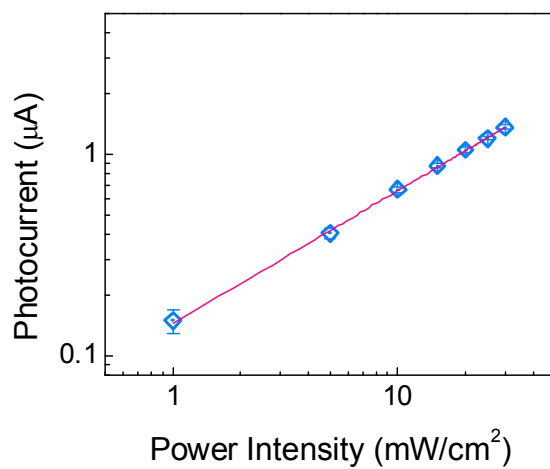

**Figure S3.** Power-law relationship of  $I_{ph}$  with  $P_L$  of a Na:ZnO NF sensor,  $I_{ph} \propto P_L^{0.66}$ .

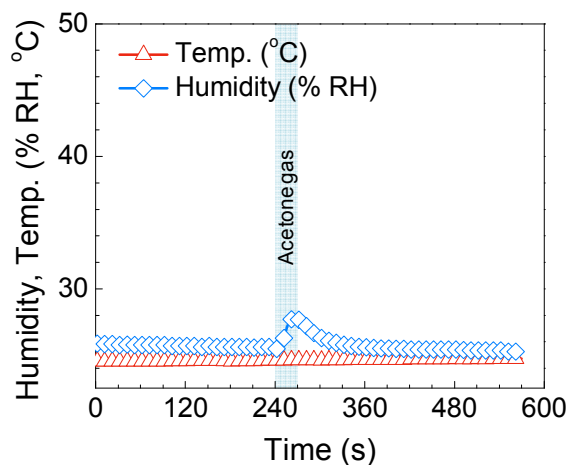

**Figure S4.** The relative humidity (%RH) and temperature variation inside the sensing chamber during the operation of a Na:ZnO NF sensor exposed to 100 ppm acetone gas (UV intensity of  $5 \text{ mW cm}^{-2}$ ).

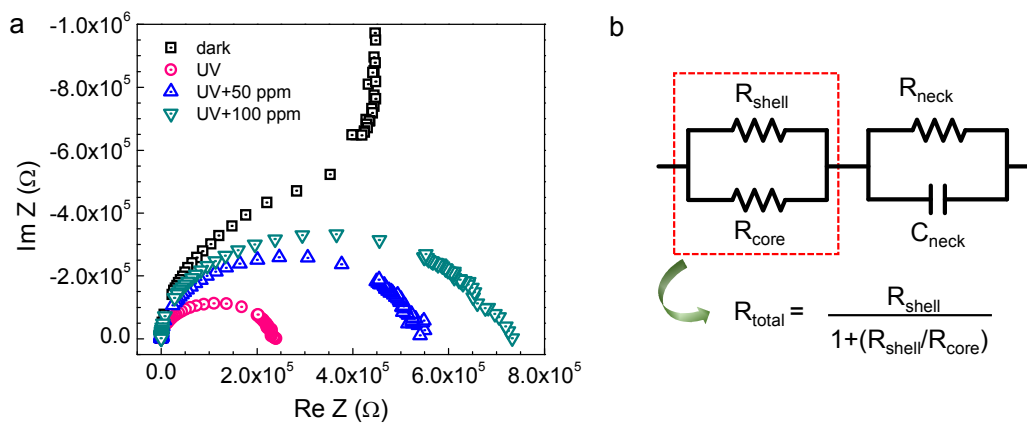

**Figure S5.** (a) AC impedance spectroscopy data, and (b) an RC model for the Na:ZnO NF gas sensor. The  $R_{shell}$ ,  $R_{core}$  and  $R_{neck}$  represent the resistance of shell, core and neck of NFs, respectively. Also, the  $C_{neck}$  represents the capacitance of neck between the inter-grain NFs.
